# Supplementary material
Source: bioRxiv or medRxiv preprint supplement (https://www.biorxiv.org/highwire/filestream/39215/field_highwire_adjunct_files/2/133173-3.pdf)
Supplement: Supplementary file [file 133173-3.pdf]

# SessionInfo

2017-05-02

Code version: 6a7b77ea5b435ac53714ac023ea83e00a25a9e40

## Session information

Details of the R environment and packages used for analysis.

```
## setting value
## version R version 3.3.1 (2016-06-21)
## system x86_64, linux-gnu
## ui X11
## language (EN)
## collate en_US.UTF-8
## tz <NA>
## date 2017-05-02
##
## package * version date source
## AnnotationDbi 1.36.2 2017-03-30 Bioconductor
## assertthat 0.1 2013-12-06 CRAN (R 3.3.1)
## backports 1.0.5 2017-01-18 CRAN (R 3.3.1)
## beeswarm 0.2.3 2016-04-25 CRAN (R 3.3.0)
## Biobase * 2.34.0 2016-10-24 cran (@2.34.0)
## BiocGenerics * 0.20.0 2016-10-24 Bioconductor
## BiocParallel * 1.8.1 2016-11-16 Bioconductor
## biomaRt 2.30.0 2016-11-08 Bioconductor
## bitops 1.0-6 2013-08-17 CRAN (R 3.3.1)
## broom 0.4.2 2017-02-13 CRAN (R 3.3.1)
## caTools 1.17.1 2014-09-10 CRAN (R 3.3.1)
## checkmate 1.8.2 2016-11-02 CRAN (R 3.3.1)
## class 7.3-14 2015-08-30 CRAN (R 3.3.1)
## clues * 0.5.9 2016-10-14 CRAN (R 3.3.1)
## cluster 2.0.6 2017-03-16 CRAN (R 3.3.1)
## codetools 0.2-15 2016-10-05 CRAN (R 3.3.0)
## colorspace 1.3-2 2016-12-14 CRAN (R 3.3.1)
## cowplot * 0.7.0 2016-10-28 CRAN (R 3.3.1)
## data.table 1.10.4 2017-02-01 CRAN (R 3.3.1)
## DBI 0.6 2017-03-09 CRAN (R 3.3.1)
## DEoptimR 1.0-8 2016-11-19 CRAN (R 3.3.1)
## devtools * 1.12.0 2016-06-24 CRAN (R 3.3.0)
## digest 0.6.10 2016-08-02 CRAN (R 3.3.0)
## doParallel 1.0.10 2015-10-14 CRAN (R 3.3.1)
## doRNG 1.6 2014-03-07 CRAN (R 3.3.1)
## dplyr * 0.5.0 2016-06-24 CRAN (R 3.3.1)
## e1071 1.6-8 2017-02-02 CRAN (R 3.3.1)
## edgeR 3.16.5 2017-02-03 cran (@3.16.5)
## evaluate 0.10 2016-10-11 CRAN (R 3.3.0)
## forcats 0.2.0 2017-01-23 CRAN (R 3.3.1)
## foreach 1.4.3 2015-10-13 CRAN (R 3.3.1)
## foreign 0.8-67 2016-09-13 CRAN (R 3.3.0)
```

```

## gdata                2.17.0    2015-07-04 CRAN (R 3.3.1)
## GenomeInfoDb         1.10.3    2017-03-30 Bioconductor
## GenomicRanges        1.26.4    2017-03-30 Bioconductor
## ggbeeswarm           0.5.3    2016-12-01 CRAN (R 3.3.1)
## ggplot2              * 2.2.1    2016-12-30 CRAN (R 3.3.1)
## gplots               3.0.1    2016-03-30 CRAN (R 3.3.1)
## gridExtra            2.2.1    2016-02-29 CRAN (R 3.3.1)
## gtable               0.2.0    2016-02-26 CRAN (R 3.3.1)
## gtools               3.5.0    2015-05-29 CRAN (R 3.3.1)
## haven                1.0.0    2016-09-23 CRAN (R 3.3.0)
## hms                  0.3      2016-11-22 CRAN (R 3.3.1)
## htmltools            0.3.5    2016-03-21 CRAN (R 3.3.1)
## httpuv              1.3.3    2015-08-04 CRAN (R 3.3.1)
## httr                 1.2.1    2016-07-03 CRAN (R 3.3.1)
## IRanges              2.8.2    2017-03-30 Bioconductor
## iterators            1.0.8    2015-10-13 CRAN (R 3.3.1)
## jsonlite             1.3      2017-02-28 CRAN (R 3.3.1)
## KernSmooth           2.23-15  2015-06-29 CRAN (R 3.3.1)
## knitr                * 1.15.1   2016-11-22 CRAN (R 3.3.1)
## lattice              0.20-35  2017-03-25 CRAN (R 3.3.1)
## lazyeval             0.2.0    2016-06-12 CRAN (R 3.3.1)
## limma                3.30.13  2017-03-30 Bioconductor
## locfit               1.5-9.1  2013-04-20 CRAN (R 3.3.1)
## lubridate            1.6.0    2016-09-13 CRAN (R 3.3.0)
## magrittr             * 1.5      2014-11-22 CRAN (R 3.3.1)
## Matrix               1.2-8    2017-01-20 CRAN (R 3.3.1)
## matrixStats          0.51.0   2016-10-09 CRAN (R 3.3.0)
## memoise              1.0.0    2016-01-29 CRAN (R 3.3.1)
## mime                 0.5      2016-07-07 CRAN (R 3.3.1)
## mnormt               1.5-5    2016-10-15 CRAN (R 3.3.0)
## modelr               0.1.0    2016-08-31 CRAN (R 3.3.0)
## munsell              0.4.3    2016-02-13 CRAN (R 3.3.1)
## mvtnorm              1.0-6    2017-03-02 CRAN (R 3.3.1)
## nlme                 3.1-131  2017-02-06 CRAN (R 3.3.1)
## pcaPP                1.9-61   2016-10-11 CRAN (R 3.3.0)
## pheatmap             1.0.8    2015-12-11 CRAN (R 3.3.0)
## pkgmaker             0.22     2014-05-14 CRAN (R 3.3.1)
## plyr                 1.8.4    2016-06-08 CRAN (R 3.3.1)
## png                  0.1-7    2013-12-03 CRAN (R 3.3.1)
## psych                1.7.3.21 2017-03-22 CRAN (R 3.3.1)
## purrr                * 0.2.2    2016-06-18 CRAN (R 3.3.0)
## R6                   2.2.0    2016-10-05 CRAN (R 3.3.0)
## RColorBrewer         1.1-2    2014-12-07 CRAN (R 3.3.1)
## Rcpp                 0.12.10  2017-03-19 CRAN (R 3.3.1)
## RCurl                1.95-4.8 2016-03-01 CRAN (R 3.3.1)
## readr                * 1.0.0    2016-08-03 CRAN (R 3.3.0)
## readxl               0.1.1    2016-03-28 CRAN (R 3.3.1)
## registry             0.3      2015-07-08 CRAN (R 3.3.1)
## reshape2            1.4.2    2016-10-22 CRAN (R 3.3.1)
## rhdf5                2.18.0   2016-10-24 Bioconductor
## rjson                0.2.15   2014-11-03 CRAN (R 3.3.0)
## rmarkdown            * 1.4      2017-03-24 CRAN (R 3.3.1)
## rngtools             1.2.4    2014-03-06 CRAN (R 3.3.1)
## robustbase           0.92-7   2016-12-09 CRAN (R 3.3.1)

```

|    |                      |          |            |                |
|----|----------------------|----------|------------|----------------|
| ## | ROCR                 | 1.0-7    | 2015-03-26 | CRAN (R 3.3.1) |
| ## | rprojroot            | 1.2      | 2017-01-16 | CRAN (R 3.3.1) |
| ## | rrcov                | 1.4-3    | 2016-09-06 | CRAN (R 3.3.0) |
| ## | RSQLite              | 1.1-2    | 2017-01-08 | CRAN (R 3.3.1) |
| ## | rstudioapi           | 0.6      | 2016-06-27 | CRAN (R 3.3.1) |
| ## | rvest                | 0.3.2    | 2016-06-17 | CRAN (R 3.3.0) |
| ## | S4Vectors            | 0.12.1   | 2016-12-06 | Bioconductor   |
| ## | SC3                  | * 1.3.15 | 2017-03-30 | Bioconductor   |
| ## | scales               | 0.4.1    | 2016-11-09 | CRAN (R 3.3.1) |
| ## | scater               | * 1.2.0  | 2016-10-24 | Bioconductor   |
| ## | shiny                | 1.0.0    | 2017-01-12 | CRAN (R 3.3.1) |
| ## | shinydashboard       | 0.5.3    | 2016-09-20 | CRAN (R 3.3.0) |
| ## | splatter             | * 1.0.1  | 2017-04-28 | Bioconductor   |
| ## | stringi              | 1.1.2    | 2016-10-01 | CRAN (R 3.3.0) |
| ## | stringr              | 1.2.0    | 2017-02-18 | CRAN (R 3.3.1) |
| ## | SummarizedExperiment | 1.4.0    | 2016-11-08 | Bioconductor   |
| ## | tibble               | * 1.2    | 2016-08-26 | CRAN (R 3.3.0) |
| ## | tidyr                | * 0.6.1  | 2017-01-10 | CRAN (R 3.3.1) |
| ## | tidyverse            | * 1.1.1  | 2017-01-27 | CRAN (R 3.3.1) |
| ## | tximport             | 1.2.0    | 2016-10-24 | Bioconductor   |
| ## | vipor                | 0.4.5    | 2017-03-22 | CRAN (R 3.3.1) |
| ## | viridis              | 0.4.0    | 2017-03-27 | CRAN (R 3.3.1) |
| ## | viridisLite          | 0.2.0    | 2017-03-24 | CRAN (R 3.3.1) |
| ## | withr                | 1.0.2    | 2016-06-20 | CRAN (R 3.3.1) |
| ## | WriteXLS             | 4.0.0    | 2015-12-07 | CRAN (R 3.3.1) |
| ## | XML                  | 3.98-1.6 | 2017-03-30 | CRAN (R 3.3.1) |
| ## | xml2                 | 1.1.1    | 2017-01-24 | CRAN (R 3.3.1) |
| ## | xtable               | 1.8-2    | 2016-02-05 | CRAN (R 3.3.1) |
| ## | XVector              | 0.14.1   | 2017-03-30 | Bioconductor   |
| ## | yaml                 | 2.1.14   | 2016-11-12 | CRAN (R 3.3.1) |
| ## | zlibbioc             | 1.20.0   | 2016-11-08 | Bioconductor   |
